# Supplementary material
Source: PubMed Central journal article supplement (PMC3877806)

**Supplemental Figure 1. *DR5rev:GFP* expression after IAA and oxIAA treatment.**

Pictures of root tips from 4-DAG *Arabidopsis* seedlings expressing *DR5rev:GFP* after 4h (A) and 24h (B) treatment with 0 (control), 1, 10 or 100  $\mu$ M IAA or oxIAA.

Fluorescence intensity measured over the meristematic zone of the primary root apex after 4h (C) and 24h (D) treatment with 0 (control), 1, 10 and 100  $\mu$ M IAA or oxIAA. Error bars indicate standard deviation (n=15). The asterisks denote a significant difference between the control (Ctrl) and the treated samples using Student's t-Test (\*  $p < 0.05$ , \*\*\*  $p < 0.001$ ).

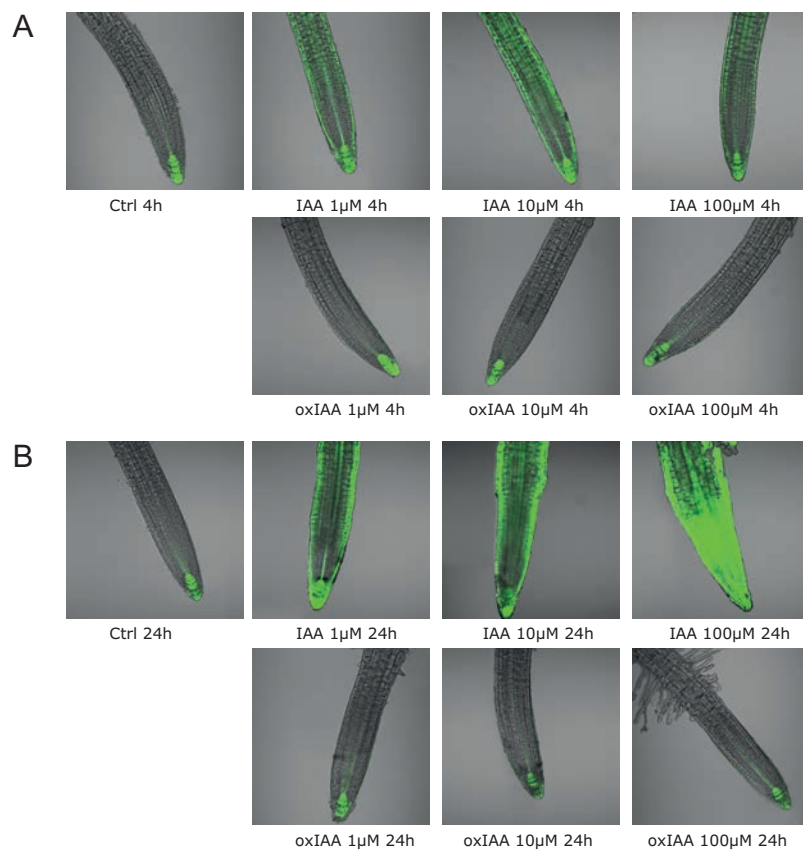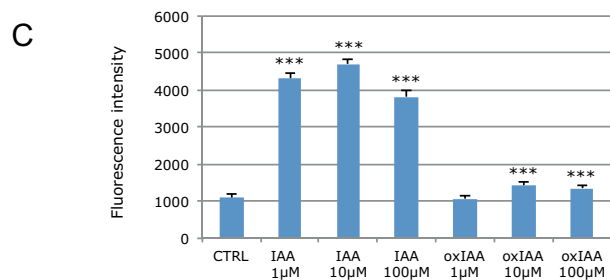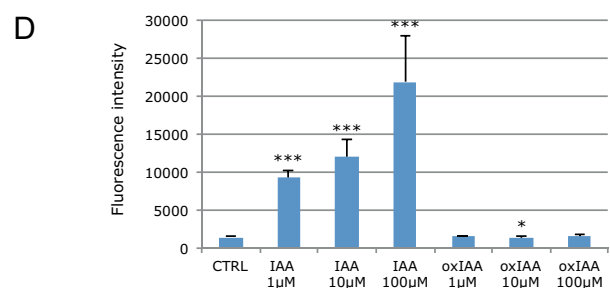

### Supplemental Figure 2. Activity of IAA and oxIAA in hypocotyl elongation assays.

Hypocotyl elongation was measured after treating 5-DAG wild type *Arabidopsis* Col-0 seedlings with different concentrations of IAA or oxIAA for 48 hours. IAA induced hypocotyl elongation in concentrations between 0.5 and 50  $\mu\text{M}$ . OxIAA had no significant effect on hypocotyl elongation at the concentrations tested (up to 1000  $\mu\text{M}$ ). Error bars indicate standard error (n=24).

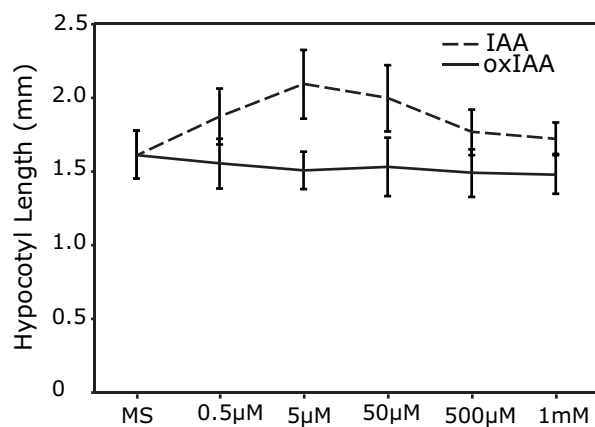

Supplement: supp_tpc.113.114421_tpc114421_Supplemental_Data.pdf [file supp_tpc.113.114421_tpc114421_Supplemental_Data.pdf]
